# Supplementary material
Source: PubMed Central journal article supplement (PMC2730915)
Supplement: NIHMS106576-supplement-1.pdf [file NIHMS106576-supplement-1.pdf]

**Supplementary Table 1. Yeast strains**

| Strain  | Relevant genotype                                                                               |
|---------|-------------------------------------------------------------------------------------------------|
| SJR2571 | <i>apn1Δ::TRP1</i>                                                                              |
| SJR2712 | <i>ntg1Δ::loxP-TRP1-loxP ntg2Δ::loxP-hyg-loxP</i>                                               |
| SJR2653 | <i>apn1Δ::TRP1 mag1Δ:: hyg</i>                                                                  |
| SJR2752 | <i>apn1Δ::TRP1 ogg1Δ::loxP-URA3KI-loxP</i>                                                      |
| SJR2750 | <i>apn1Δ::TRP1 ung1Δ::loxP-hyg-loxP</i>                                                         |
| SJR2726 | <i>apn1Δ::loxP-URA3KI-loxP ntg1Δ::loxP-TRP1-loxP ntg2Δ::loxP-hyg-loxP</i>                       |
| SJR2651 | <i>apn1Δ::TRP1 rev3Δ::hyg<sup>R</sup></i>                                                       |
| SJR2794 | <i>apn1Δ::loxP-URA3KI-loxP ntg1Δ::loxP ntg2Δ::loxP-hyg-loxP</i><br><i>ung1Δ::loxP-TRP1-loxP</i> |
| SJR2780 | <i>apn1Δ::loxP-URA3KI-loxP ntg1Δ::loxP ntg2Δ::loxP-hyg-loxP</i><br><i>rev3Δ::TRP1</i>           |
| SJR2817 | <i>apn1Δ::loxP-TRP1-loxP ntg1Δ::loxP ntg2Δ::loxP-hyg-loxP</i>                                   |

All strains were derived from SJR2391 [*MAT $\alpha$  ura3-52 ade2-101<sub>oc</sub> trp1 $\Delta$ 1 lys2 $\Delta$ ::nat leu2-K:TetR'-Ssn6:LEU2 his4 $\Delta$ ::TET-lys2 $\Delta$ A746F (*kan<sup>R</sup>)*]<sup>1</sup>. Deletion of DNA repair/bypass genes was accomplished by one-step disruption with PCR-generated fragments. These fragments contained one of the following individual selective sequences flanked by appropriate locus-specific targeting sequences: *hyg*<sup>2</sup>, *TRP1*<sup>3</sup>, *loxP-URAKI-loxP*<sup>4</sup>, *loxP-hyg-loxP* (pSR955), or *loxP-TRP1-loxP* (pSR954). pSR955 or pSR954 were derived by replacing the *kan* marker of pUG6<sup>5</sup> with a *BglII/SacI* fragment containing a *hyg* marker (from hphMX4<sup>2</sup>) or a *TRP1* marker*

(from pFA6-TRP1<sup>3</sup>), respectively. When applicable, subsequent Cre/LoxP-mediated deletion of the selective marker was carried out according to described protocols<sup>4</sup>.

1. Kim, N., Abdulovic, A. L., Gealy, R., Lippert, M. J., and Jinks-Robertson, S. Transcription-associated mutagenesis in yeast is directly proportional to the level of gene expression and influenced by the direction of DNA replication. *DNA Repair* **6**, 1285 (2007).
2. Goldstein, A. L. and McCusker, J. H. Three new dominant drug resistance cassettes for gene disruption in *Saccharomyces cerevisiae*. *Yeast* **15**, 1541 (1999).
3. Longtine, M.S. et al. Additional modules for versatile and economical PCR-based gene deletion and modification in *Saccharomyces cerevisiae*. *Yeast* **14**, 953 (1998).
4. Gueldener, U., Heinisch, J., Koehler, G. J., Voss, D., and Hegemann, J. H. A second set of loxP marker cassettes for Cre-mediated multiple gene knockouts in budding yeast. *Nucleic Acids Res.* **30**, e23 (2002).
5. Guldener, U., Heck, S., Fielder, T., Beinhauer, J., and Hegemann, J. H. A new efficient gene disruption cassette for repeated use in budding yeast. *Nucleic Acids Res.* **24**, 2519 (1996).

**Supplementary Table 2. Effect of Dut1 overexpression on mutation rates**

| Genotype              | <i>TET-lys2ΔA746</i> reversion rate x 10 <sup>-8</sup> |                          | <i>CAN1</i> forward mutation rate x 10 <sup>-8</sup> |                          |
|-----------------------|--------------------------------------------------------|--------------------------|------------------------------------------------------|--------------------------|
|                       | (95% CI)                                               |                          | (95% CI)                                             |                          |
|                       | pRS426                                                 | pRS426- <i>GAL1-DUT1</i> | pRS426                                               | pRS426- <i>GAL1-DUT1</i> |
| <i>apn1</i>           | 23.0<br>(14.1-28.0)                                    | 15.1<br>(5.69-29.7)      | 99.2<br>(95.1-122)                                   | 106<br>(55.7-171)        |
| <i>apn1 ntg1 ntg2</i> | 171<br>(143-281)                                       | 17.1<br>(16.3-21.4)      | 224<br>(199-308)                                     | 159<br>(106-287)         |

Approximately five primary Ura<sup>+</sup> transformants were inoculated directly into SC-Ura liquid medium supplemented with 2% glycerol, 2% ethanol, and 2% galactose. The following day, parallel 1 ml cultures were started in the same medium using ~500,000 cells of the overnight culture. After 4 days growth at 30°, appropriate dilutions were plated on SCD-Ura to determine the number of plasmid-containing cells, on SCD-Ura-Lys to select Lys<sup>+</sup> revertants, or on SCD-Ura-Arg supplemented with 60 μg/ml L-canavanine sulfate (Sigma) to select *can1* mutants. CI = confidence interval.

**Supplementary Table 3. Complex mutations at the 5T2G hotspot**

| Strain genotype             | Lys <sup>+</sup> rate x 10 <sup>-8</sup><br>(95% CI) | Complex mutations at the 5T2G hotspot |                            |
|-----------------------------|------------------------------------------------------|---------------------------------------|----------------------------|
|                             |                                                      | Number/total                          | Rate (x 10 <sup>-8</sup> ) |
| WT                          | 4.28 (3.35-6.74)                                     | 0/117                                 | <0.037*                    |
| <i>apn1</i>                 | 14.5 (12.4-18.1)                                     | 8/127                                 | 0.91                       |
| <i>apn1 ntg1 ntg2</i>       | 150 (125-192)                                        | 21/94                                 | 34                         |
| <i>apn1 ntg1 ntg2</i> + Dox | 1.19 (0.949-1.32)                                    | 0/89                                  | <0.013*                    |
| <i>apn1 ntg1 ntg2 rev3</i>  | 5.14 (2.65-10.2)                                     | 0/92                                  | <0.057*                    |
| <i>apn1 ntg1 ntg2 ung1</i>  | 8.15 (6.52-14.8)                                     | 0/89                                  | <0.092*                    |

Dox = doxycycline; CI = confidence interval

\* rate calculated assuming 1 event

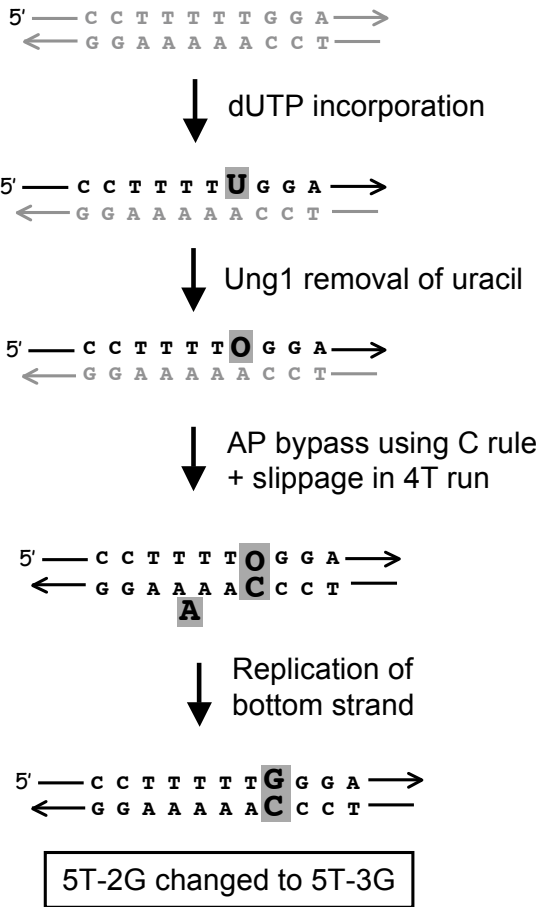

**Supplementary Figure 1.** Model for complex insertions at the 5T2G hotspot. Black lines and letters correspond to newly-synthesized DNA. O = AP site.
